# Supplementary material
Source: publisher site journal article supplement (http://kjim.org/upload/media/kjim-2016-303-suppl4.pdf)
Supplement: Supplementary file 1 [file kjim-2016-303-suppl4.pdf]

**Supplementary Table 4. Electrocardiography and echocardiogram of the patients with scrub typhus with and without atrial fibrillation admitted to the intensive care unit**

| Variable              | All patients | Without AF (n = 68) | With AF (n = 21) | p value              |
|-----------------------|--------------|---------------------|------------------|----------------------|
| Myocarditis           | 13 (14.6)    | 8 (11.7)            | 5 (23.8)         | 0.174                |
| Heart rate, beats/min | 104 ± 28     | 92 ± 19             | 133 ± 30         | < 0.001 <sup>a</sup> |
| PR interval, ms       | 162 ± 48     | 169 ± 39            | 161 ± 46         | 0.440                |
| QRS duration, ms      | 98 ± 18      | 93 ± 17             | 98 ± 23          | 0.396                |
| QTc interval, ms      | 457 ± 55     | 441 ± 62            | 464 ± 45         | 0.127                |
| ST-elevation          | 13 (14.6)    | 9 (13.2)            | 4 (30.7)         | < 0.001 <sup>a</sup> |
| Ejection fraction     | 48 ± 11      | 60 ± 14             | 55 ± 16          | 0.144                |
| Pericardial effusion  | 18 (20.2)    | 11 (16.1)           | 7 (33.3)         | 0.088                |

Values are presented as number (%) or mean ± SD.

AF, atrial fibrillation; QTc, corrected QT interval.

<sup>a</sup>Statistically significant.
